# Supplementary material for: Formation of Reactive Nitrogen Species Promoted by Iron Ions Through the Photochemistry of Neonicotinoid Insecticide
Source: Copernicus journal article supplement (doi:10.5194/egusphere-2024-1116), 2024-04-17
Supplement: Supplementary file 1 [file egusphere-2024-1116-supplement.pdf]

1  
2  
3  
4  
5  
6  
7  
8  
9  
10  
11  
12  
13  
14  
15  
16  
17  
18  
19  
20  
21  
22  
23  
24  
25  
26  
27  
28  
29  
30  
31  
32

## Supplementary Materials for

# Formation of Reactive Nitrogen Species Promoted by Iron Ions Through the Photochemistry of Neonicotinoid Insecticide

Zhu Ran<sup>1,2</sup>, Yanan Hu<sup>1,2,3\*</sup>, Yuanzhe Li<sup>1,2</sup>, Xiaoya Gao<sup>1,2</sup>, Can Ye<sup>4</sup>, Shuai Li<sup>5</sup>, Xiao Lu<sup>5</sup>, Yongming Luo<sup>1,2,3</sup>, Sasho Gligorovski<sup>6,7,8\*</sup>, Jiangping Liu<sup>1,2\*</sup>

<sup>1</sup>Faculty of Environmental Science and Engineering, Kunming University of Science and Technology, Kunming 650500, China;

<sup>2</sup>The Innovation Team for Volatile Organic Compounds Pollutants Control and Resource Utilization of Yunnan Province, The Higher Educational Key Laboratory for Odorous Volatile Organic Compounds Pollutants Control of Yunnan Province, Kunming 650500, China;

<sup>3</sup>Faculty of Chemical Engineering, Kunming University of Science and Technology, Kunming 650500, China;

<sup>4</sup>Faculty of Environmental Science and Engineering, Peking University, Beijing 100871, China;

<sup>5</sup>School of Atmospheric Sciences, Sun Yat-sen University, Southern Marine Science and Engineering Guangdong Laboratory (Zhuhai), Zhuhai, Guangdong 519082, China;

<sup>6</sup>State Key Laboratory of Organic Geochemistry and Guangdong Provincial Key Laboratory of Environmental Protection and Resources Utilization, Guangzhou Institute of Geochemistry, Chinese Academy of Sciences, Guangzhou 510 640, China;

<sup>7</sup>Guangdong-Hong Kong-Macao Joint Laboratory for Environmental Pollution and Control, Guangzhou Institute of Geochemistry, Chinese Academy of Science, Guangzhou 510640, China;

<sup>8</sup>Chinese Academy of Science, Center for Excellence in Deep Earth Science, Guangzhou, 510640, China.

*Correspondence:* (Sasho Gligorovski) gligorovski@gig.ac.cn; (Jiangping Liu) liujiangping18@mails.ucas.ac.cn; (Yanan Hu) huyan0917@163.com

### 33 **Supplementary Text**

#### 34 **Text S1. Ionic analysis at different Fe<sup>3+</sup> concentrations**

35 As depicted in Figure S2, the direct photolysis of NPM produced a large amount of NO<sub>3</sub><sup>-</sup> and NO<sub>2</sub><sup>-</sup> in the  
36 absence of Fe<sup>3+</sup>, and in the presence of Fe<sup>3+</sup> restricted NO<sub>3</sub><sup>-</sup> and NO<sub>2</sub><sup>-</sup> production occurred, which was  
37 consistent with the change of the photolysis rate constant of NPM. NO<sub>2</sub> produced by direct photolysis of  
38 NPM is hydrolyzed in aqueous media to form NO<sub>2</sub><sup>-</sup> and NO<sub>3</sub><sup>-</sup>, and nitrogenous species are partially  
39 dissolved during their release from the liquid to the gas phase. The reaction of NO<sub>x</sub> with O<sub>2</sub><sup>-</sup> radicals will  
40 also produce NO<sub>2</sub><sup>-</sup> and NO<sub>3</sub><sup>-</sup>. The presence of Fe<sup>3+</sup> provides a strong acid environment (Table S1) and the  
41 protonation of NO<sub>2</sub><sup>-</sup> will lead to the release of HONO (Lu et al., 2015; Wang et al., 2021). Upon  
42 irradiation at λ>300 nm, Fe<sup>3+</sup> species (monomeric and dimeric) are known to undergo a redox process  
43 giving rise to Fe(II) and •OH radicals (Bai et al., 2023). Fe<sup>2+</sup> cannot coexist with NO<sub>3</sub><sup>-</sup>, and NO<sub>2</sub> gas will  
44 be produced by redox reaction. In short, the addition of Fe<sup>3+</sup> promotes the conversion of NO<sub>3</sub><sup>-</sup> and NO<sub>2</sub><sup>-</sup>  
45 to HONO and NO<sub>x</sub>. In the presence of high Fe<sup>3+</sup> concentration, the photolysis rate of NPM showed an  
46 increasing trend, and •OH and O<sub>2</sub><sup>-</sup> produced under light irradiation were more elevated than those  
47 produced under low concentration of Fe<sup>3+</sup> (Figure 2), which slightly promoted the generation of NO<sub>3</sub><sup>-</sup>  
48 and NO<sub>2</sub><sup>-</sup>.

#### 49 **Text S2. Global simulation of NO<sub>x</sub> and HONO fluxes**

50 We developed the global inventory of the NPM-emitted NO<sub>x</sub> and HONO fluxes. Gridded and hourly  
51 downward solar radiation data are obtained from the Modern-Era Retrospective analysis for Research  
52 and Application version 2 (MERRA-2) assimilated meteorological fields. We calculated the emission  
53 flux for each model grid at a horizontal resolution of 0.5°×0.625° (consistent with MERRA2 radiation  
54 dataset) following Eq-S1, but assuming that the environmental NPM concentration is three orders smaller  
55 than the experimental conditions of 0.5 mg L<sup>-1</sup>. We examined the relationship between HONO and NO<sub>x</sub>  
56 formation and light intensity from the experimental results, at a fixed NPM concentration level (Figure  
57 S5-S6). The parameterization of HONO and NO<sub>x</sub> productions from NPM photolysis at Fe<sup>3+</sup>  
58 concentration of 0.025 mg ml<sup>-1</sup> used in our estimation is based on Eq-S1:

$$59 Y_{\text{HONO}}=1.58595*10^9 X-1.19123*10^{11}, \quad Y_{\text{NO}_2}=6.58261*10^8 X-1.81889*10^{10}, \quad Y_{\text{NO}}=2.58054*10^8 X- \\ 60 1.41507*10^{10} \quad \text{Eq-S1}$$

61 where  $y$  represents the HONO/NO<sub>x</sub> fluxes,  $X$  represents the light density.

62 **Table S1.** Measured Photolysis Rate Constants (k) and Half-time ( $T_{1/2}$ ) of NPM in aqueous solution at different  $Fe^{3+}$   
 63 concentrations.

| The concentration of $Fe^{3+}$ / mg.ml <sup>-1</sup> | Kinetic equation           | Rate Constants (k)/min <sup>-1</sup> | Half-time ( $T_{1/2}$ )/min | R <sup>2</sup> | Initial pH value |
|------------------------------------------------------|----------------------------|--------------------------------------|-----------------------------|----------------|------------------|
| 0                                                    | $C_t = 0.501e^{-0.00427t}$ | 0.00427                              | 162.3                       | 0.99438        | 7.3              |
| 0.1                                                  | $C_t = 0.477e^{-0.00382t}$ | 0.00382                              | 181.5                       | 0.98757        | 3.4              |
| 0.25                                                 | $C_t = 0.520e^{-0.00310t}$ | 0.00310                              | 223.6                       | 0.98065        | 2.9              |
| 0.5                                                  | $C_t = 0.514e^{-0.00346t}$ | 0.00346                              | 200.3                       | 0.98869        | 2.6              |
| 0.8                                                  | $C_t = 0.513e^{-0.00513t}$ | 0.00513                              | 135.1                       | 0.99064        | 2.4              |

64

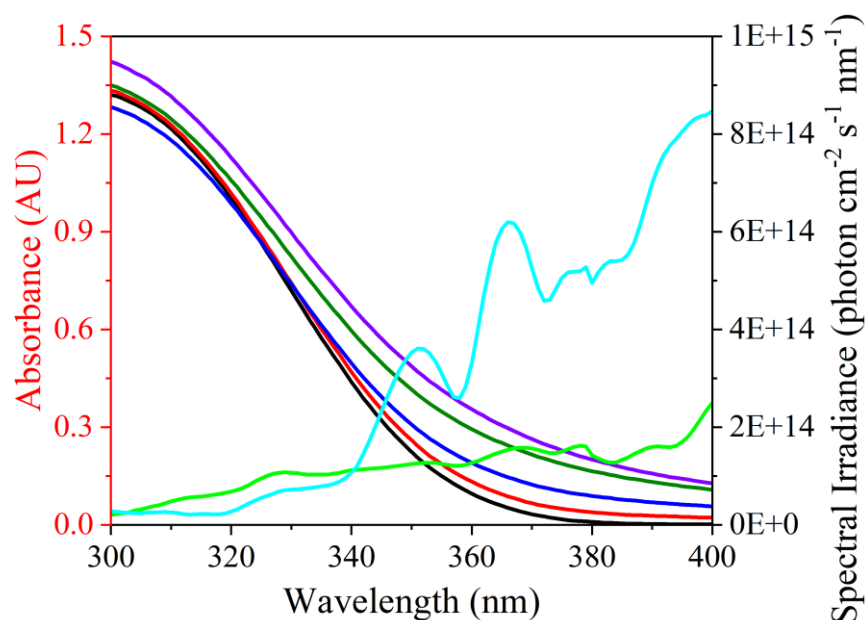

65

66 **Figure S1.** The absorption spectra of NPM (0.05 mg ml<sup>-1</sup>) in the absence of  $Fe^{3+}$  (dark line), and in the presence of  
 67 different concentrations of  $Fe^{3+}$ : 0.01 mg ml<sup>-1</sup> (red line), 0.025 mg ml<sup>-1</sup> (blue line), 0.05 mg ml<sup>-1</sup> (green line) and  
 68 0.08 mg ml<sup>-1</sup> (purple line). Comparison of the spectral irradiance of the Xenon lamp (fluorescent light blueed line)  
 69 and the spectral irradiance of the sunlight (fluorescent light green line) measured by the spectroradiometer  
 70 (HP350UVP, China). The spectral irradiance is determined for Kunming (latitude 24.85285, longitude 102.86016)  
 71 on July 26 2022 at noon.

72

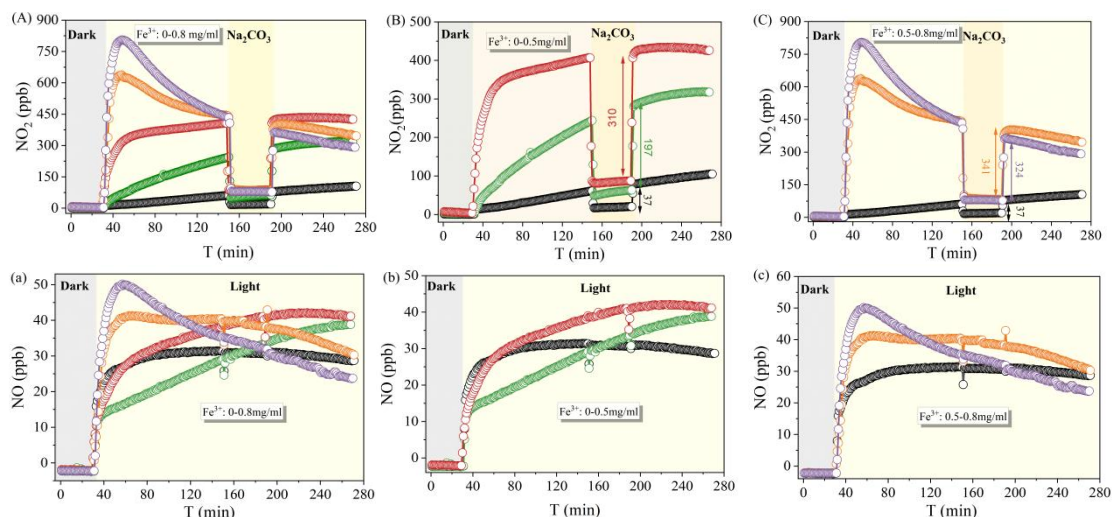

73

74 **Figure S2.** The temporal changes of NO<sub>2</sub>, HONO and NO during the photolysis of NPM (0.5 mg ml<sup>-1</sup>) in the absence  
 75 of Fe<sup>3+</sup> (dark line), and in the presence of different concentrations of Fe<sup>3+</sup>: 0.1 mg ml<sup>-1</sup> (blue line), 0.25 mg ml<sup>-1</sup> (red  
 76 line), 0.5 mg ml<sup>-1</sup> (orange line) and 0.8 mg ml<sup>-1</sup> (purple line). Reaction conditions: irradiation intensity of 169.4 W  
 77 m<sup>-2</sup> at 300-400 nm, temperature of 298 K.

78

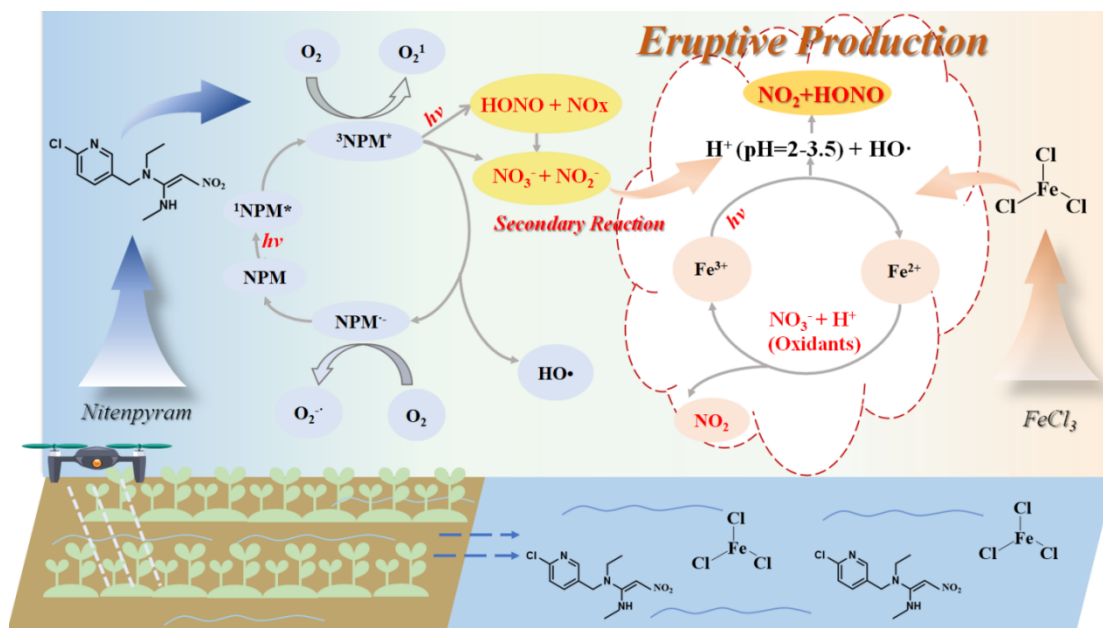

79

80 **Figure S3.** Proposed mechanism of NPM photolysis in the presence of iron ions leading to HONO and NO<sub>x</sub>  
 81 formation.

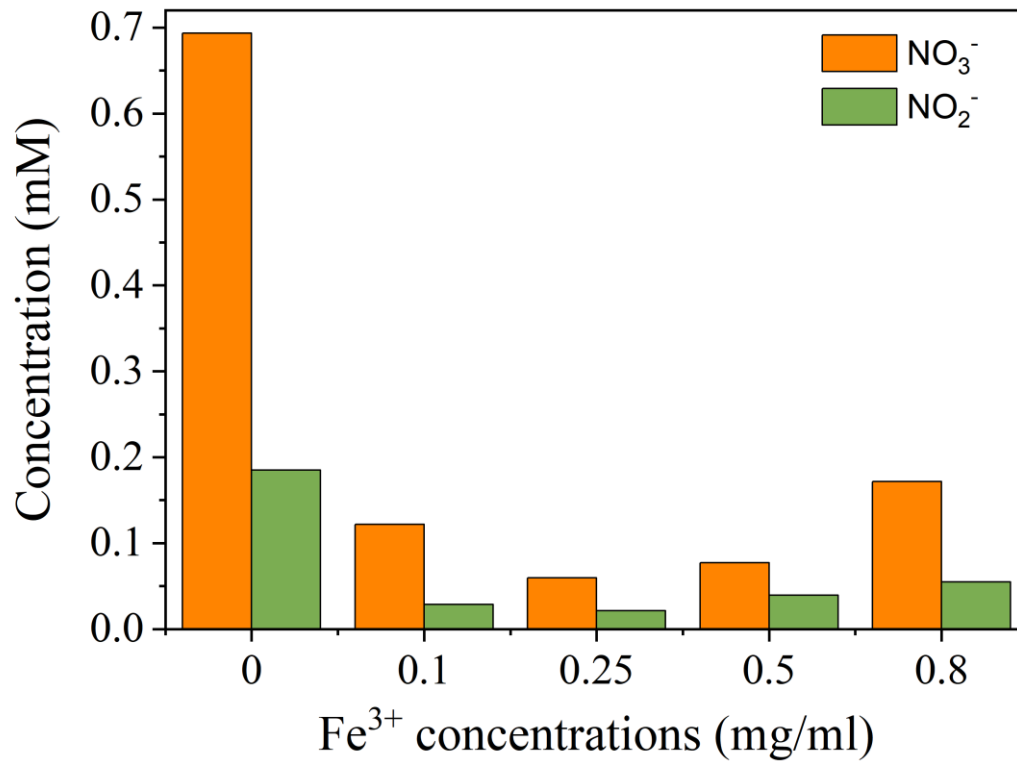

82

83

84 **Figure S4.** The nitrate and nitrite ions concentrations of NPM (0.5 mg ml<sup>-1</sup>) by 2 hours photolysis at different  
85 concentrations of Fe<sup>3+</sup>.

86

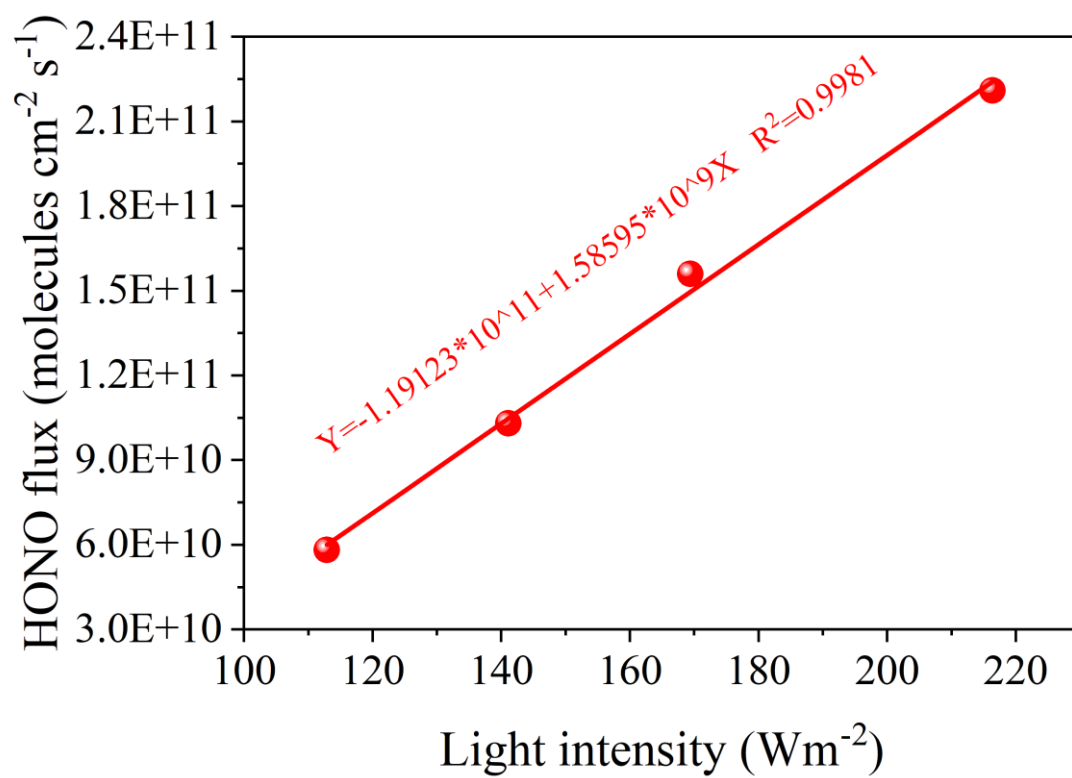

87

88

89 **Figure S5.** HONO flux from NPM photolysis under different light intensity. Conditions: NPM concentration of 0.05

90 mg ml<sup>-1</sup>, Fe<sup>3+</sup> concentration of 0.025 mg ml<sup>-1</sup>, irradiation time of 60 min, temperature of 298 K.

91

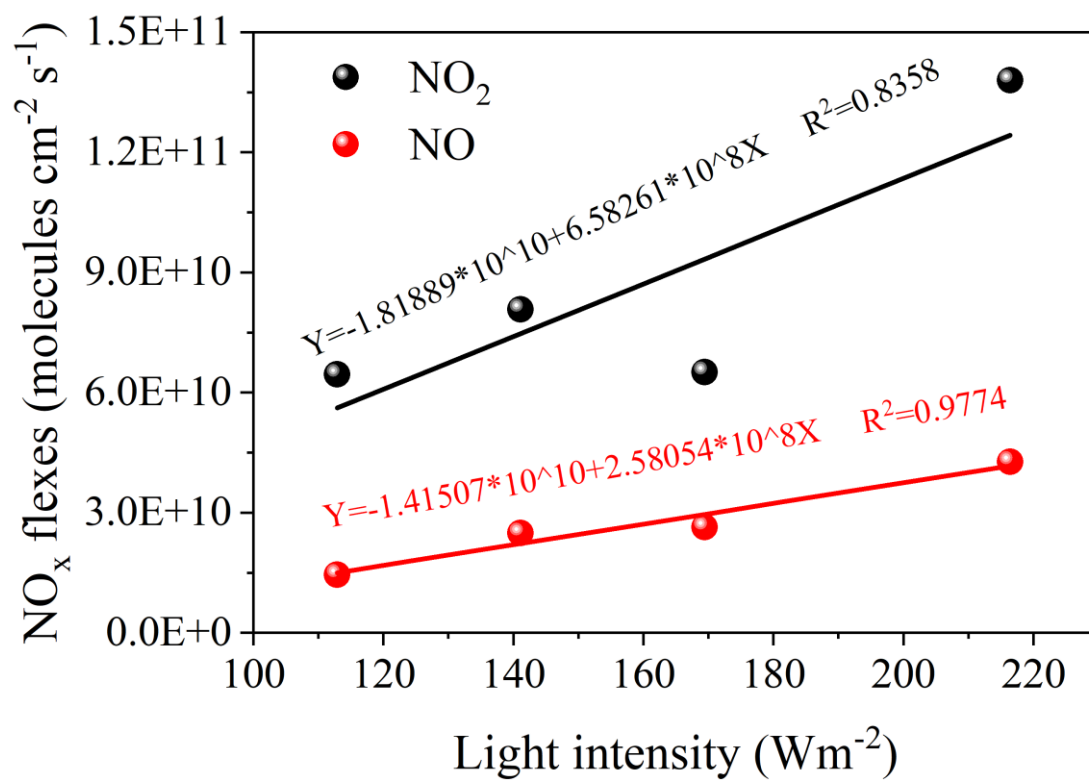

92

93

94 **Figure S6.** NO<sub>x</sub> flux from NPM photolysis under different light intensity. Conditions: NPM concentration of 0.05  
 95 mg ml<sup>-1</sup>, Fe<sup>3+</sup> concentration of 0.025 mg ml<sup>-1</sup>, irradiation time of 60 min, temperature of 298 K.

96



## References

- Lu, Z., Challis, J. K., and Wong, C. S.: Quantum Yields for Direct Photolysis of Neonicotinoid Insecticides in Water: Implications for Exposure to Nontarget Aquatic Organisms, *Environ. Sci. Technol. Lett.*, 2, 188-192, doi:10.1021/acs.estlett.5b00136, 2015.
- 100 Wang, Y., Huang, D. D., Huang, W., Liu, B., Chen, Q., Huang, R., Gen, M., Mabato, B. R. G., Chan, C. K., Li, X., Hao, T., Tan, Y., Hoi, K. I., Mok, K. M., and Li, Y. J.: Enhanced Nitrite Production from the Aqueous Photolysis of Nitrate in the Presence of Vanillic Acid and Implications for the Roles of Light-Absorbing Organics, *Environ. Sci. Technol. Lett.*, 55, 15694-15704, doi:10.1021/acs.est.1c04642, 2021.
- 105 Bai, X., Yang, Q., Guo, Y., Hao, B., Zhang, R., Duan, R., and Li, J.: Alkyl halide formation from degradation of carboxylic acids in the presence of Fe(III) and halides under light irradiation, *Water. Res.*, 235, doi:10.1016/j.watres.2023.119842, 2023.
